# Supplementary material
Source: HighWire-hosted journal article supplement (https://bmjopen.bmj.com/content/13/1/e062323)
Supplement: inline-supplementary-material-2 [file inline-supplementary-material-2.pdf]

Supplemental Table 2. International Consultation on Incontinence Questionnaire - Urinary Incontinence Short Form (ICIQ-UI SF)

|                                                                                                                                                        |                                                                                                                                                                                                                                                                                                                                                                                                                                     |
|--------------------------------------------------------------------------------------------------------------------------------------------------------|-------------------------------------------------------------------------------------------------------------------------------------------------------------------------------------------------------------------------------------------------------------------------------------------------------------------------------------------------------------------------------------------------------------------------------------|
| 1. Please write your date of birth:                                                                                                                    | <div><div><div><div></div></div><div><div></div></div><div><div></div></div><div><div></div></div></div><div>Date Month Year</div></div>                                                                                                                                                                                                                                                                                            |
| 2. To which gender identity do you most identify?                                                                                                      | Female <input type="checkbox"/> Male <input type="checkbox"/>                                                                                                                                                                                                                                                                                                                                                                       |
| 3. How often do you leak urine?<br>(Tick one box)                                                                                                      | <div><div>Never</div><div>About once a week or less often</div><div>Two or three times a week</div><div>About once a day</div><div>Several times a day</div><div>All the time</div></div> <div><div><input type="checkbox"/> 0</div><div><input type="checkbox"/> 1</div><div><input type="checkbox"/> 2</div><div><input type="checkbox"/> 3</div><div><input type="checkbox"/> 4</div><div><input type="checkbox"/> 5</div></div> |
| 4. We would like to know how much urine you think leaks.<br>How much urine do you usually leak (whether you wear protection or not)?<br>(Tick one box) | <div><div>None</div><div>A small amount</div><div>A moderate amount</div><div>A large amount</div></div> <div><div><input type="checkbox"/> 0</div><div><input type="checkbox"/> 2</div><div><input type="checkbox"/> 4</div><div><input type="checkbox"/> 6</div></div>                                                                                                                                                            |
| 5. Overall, how much does leaking urine interfere with your everyday life?<br>Please circle a number between 0 (not at all) and 10 (a great deal)      |                                                                                                                                                                                                                                                                                                                                                                                                                                     |

|                                                              |   |   |   |   |   |   |   |   |   |    |                                                   |  |                          |
|--------------------------------------------------------------|---|---|---|---|---|---|---|---|---|----|---------------------------------------------------|--|--------------------------|
| 0                                                            | 1 | 2 | 3 | 4 | 5 | 6 | 7 | 8 | 9 | 10 |                                                   |  |                          |
| Not at all                                                   |   |   |   |   |   |   |   |   |   |    | A great deal                                      |  |                          |
| ICIQ score: sum scores 3+4+5                                 |   |   |   |   |   |   |   |   |   |    | <input type="checkbox"/> <input type="checkbox"/> |  |                          |
| 6. When does urine leak? (Please tick all that apply to you) |   |   |   |   |   |   |   |   |   |    |                                                   |  |                          |
|                                                              |   |   |   |   |   |   |   |   |   |    | Never – urine does not leak                       |  | <input type="checkbox"/> |
|                                                              |   |   |   |   |   |   |   |   |   |    | Before you can get to the toilet                  |  | <input type="checkbox"/> |
|                                                              |   |   |   |   |   |   |   |   |   |    | When you cough or sneeze                          |  | <input type="checkbox"/> |
|                                                              |   |   |   |   |   |   |   |   |   |    | When you are asleep                               |  | <input type="checkbox"/> |
|                                                              |   |   |   |   |   |   |   |   |   |    | When you have finished urinating and are dressed  |  | <input type="checkbox"/> |
|                                                              |   |   |   |   |   |   |   |   |   |    | For no obvious reason                             |  | <input type="checkbox"/> |
|                                                              |   |   |   |   |   |   |   |   |   |    | All the time                                      |  | <input type="checkbox"/> |
